# Supplementary material for: Life cycle assessment of California processing tomato: an evaluation of the effects of evolving practices and technologies over a 10-year (2005–2015) timeframe
Source: Springer Nature journal article supplement (doi:10.1007/s11367-019-01688-6), 2019-11-18
Supplement: MOESM1 [file 17403130]

**Supplementary material**

**Supplementary material S1**: Grower reported data

**Supplementary material S2**: Specific inventory data collected for greenhouse and cultivation phases

**Supplementary material S3**: Results of variance and uncertainty analyses for 2005 & 2015 fertilizer data

**Supplementary material S4**: Specific inventory data collected for processing facilities

**Supplementary material S5**: Transportation distances

**Supplementary material S6**: Life Cycle Inventory Meta Data

**Supplementary material S7**: Absolute values for 2005 and 2015 LCIA results

**Supplementary material S8**: USES LCA continental-scale results per pesticide

**Supplementary material S1**: Grower reported data

**Averaged fertilizer values for 2005 and 2015 per material** (lbs/ac of element, e.g., nitrogen (N) applied) and total average lbs N /ac, phosphorus (lbs P2O5 /ac), potassium (lbs K2O /ac), and calcium (lbs Ca /ac) applied.

|  | **Average amount of N, P, K, Ca applied per material in 2005** | | | | | | | | | | | | | **Total average amount of N, P, K, Ca applied in 2005** | | | | |
| --- | --- | --- | --- | --- | --- | --- | --- | --- | --- | --- | --- | --- | --- | --- | --- | --- | --- | --- |
|  |
|  | CAN17 (lbs N/ac) | UN32 (lbs N/ac) | 4-10-10 (lbs N/ac) | 8-24-6 (lbs N/ac) | 10-34-0 (lbs N/ac) | Aqua ammonia (lbs N/ac) | 4-10-10 (lbs P2O5/ac) | 8-24-6 (lbs P2O5/ac) | 10-34-0 (lbs P2O5/ac) | 4-10-10 (lbs K2O /ac) | 8-24-6 (lbs K2O /ac) | CAN17 (lbs Ca/ac) | lbs N/ac | | lbs P2O5/ac | lbs K2O/ac | lbs Ca/ac |
| Avg. | 41.63 | 105.72 | 6.83 | 3.92 | 1.45 | 43.62 | 17.17 | 11.76 | 2.15 | 17.17 | 2.94 | 21.03 | 175.28 | | 31.08 | 20.11 | 19.27 |
| SD | 43.23 | 100.06 | 10.09 | 9.42 | 5.02 | 79.06 | 25.36 | 28.25 | 7.45 | 25.36 | 7.06 | 23.35 | 90.57 | | 30.33 | 24.14 | 23.07 |
|  | **Average amount of N, P, K, Ca applied per material in 2015** | | | | | | | | | | | | | **Total average amount of N, P, K, Ca applied in 2015** | | | | |
|  | CAN17 (lbs N/ac) | UN32 (lbs N/ac) | 4-10-10 (lbs N/ac) | 8-24-6 (lbs N/ac) | 10-34-0 (lbs N/ac) | Aqua ammonia (lbs N/ac) | 4-10-10 (lbs P2O5/ac) | 8-24-6 (lbs P2O5/ac) | 10-34-0 (lbs P2O5/ac) | 4-10-10 (lbs K2O /ac) | 8-24-6 (lbs K2O /ac) | CAN17 (lbs Ca/ac) | lbs N/ac | | lbs P2O5/ac | lbs K2O/ac | lbs Ca/ac |
|  |
| Avg. | 61.52 | 166.42 | 6.83 | 5.32 | 1.93 | 0.00 | 17.17 | 15.96 | 2.87 | 17.17 | 1.79 | 31.76 | 242.02 | | 27.20 | 27.29 | 31.62 |
| SD | 65.22 | 121.05 | 10.09 | 10.00 | 6.70 | 0.00 | 25.36 | 30.01 | 9.93 | 25.36 | 6.20 | 33.67 | 94.54 | | 30.61 | 33.21 | 35.31 |

A subsample of the grower data for 2005 and 2015 was used for direct, consistent comparison of grower practices over the study duration (n=8). Values for 8-26-0 and 8-26-6 are combined per element, N, P, K averages. SD = Standard Deviation.

**Averaged pesticide values for 2005 and 2015 per material** (lbs/ac of active ingredient, e.g., trifluralin applied)

|  | **Herbicides** | | | | | | | | | | | **Insect, disease, vertebrate pests** | | | | | | | **Additive** | |
| --- | --- | --- | --- | --- | --- | --- | --- | --- | --- | --- | --- | --- | --- | --- | --- | --- | --- | --- | --- | --- |
| **2005** | **Glyphosate (lbs/ac)** | **Trifluralin (lbs/ac)** | | **Metolachlor (lbs/ac)** | | **Oxyfluorfen (lbs/ac)** | | **Rimsulfuron (lbs/ac)** | | **Lambda Cyhalothrin (lbs/ac)** | | **Copper Hydroxide (lbs/ac)** | | **Sulfur (lbs/ac)** | | | **Chlorothalonil (lbs/ac)** | | **Adjuvant (lbs/ac)** | |
| Avg. | 2.12 | 0.44 | | 0.45 | | 0.05 | | 0.04 | | 0.31 | | 0.41 | | 13.63 | | | 0.69 | | 0.06 | |
| SD | 1.74 | 0.27 | | 0.64 | | 0.15 | | 0.06 | | 1.05 | | 0.92 | | 14.56 | | | 1.08 | | 0.14 | |
|  | **Herbicides** | | | | | | | | | |  | | **Insect, disease, vertebrate pests** | | | | | **Additive** | |
| **2015** | **Glyphosate (lbs/ac)** | | **Trifluralin (lbs/ac)** | | **Metolachlor (lbs/ac)** | | **Oxyfluorfen (lbs/ac)** | | **Rimsulfuron (lbs/ac)** | | **Lambda Cyhalothrin (lbs/ac)** | | **Copper Hydroxide (lbs/ac)** | | **Sulfur (lbs/ac)** | **Chlorothalonil (lbs/ac)** | | **Adjuvant (lbs/ac)** | |
| Avg. | 3.38 | | 0.43 | | 0.86 | | 0.07 | | 0.02 | | 0.15 | | 0.08 | | 18.68 | 0.38 | | 0.06 | |
| SD | 2.04 | | 0.36 | | 0.75 | | 0.15 | | 0.02 | | 0.53 | | 0.23 | | 25.58 | 0.72 | | 0.14 | |

A subsample of the grower data for 2005 and 2015 was used for direct, consistent comparison of grower practices over the study duration (n=13). SD = Standard Deviation.

**Supplementary material S2**: Specific inventory data collected from the greenhouse phase

| LCI data | Value | Unit |
| --- | --- | --- |
| Total no. of plants produced in greenhouse | 3.04 x10+08 | plants/yr |
| Water withdrawal | 3.76 x10-03 | kg/plant |
| Natural gas consumption | 1.88 x10-03 | kg/plant |
| Electric consumption | 2.14 x10-03 | kWh/plant |
| Diesel | 7.81 x10-06 | kg/plant |
| Propane | 2.28 x10-05 | kg/plant |
| Vermiculite | 1.47 x10-04 | kg/plant |
| Peat moss (source 1) | 3.23 x10-03 | kg/plant |
| Peat moss (source 2) | 1.22 x10-06 | m3/plant |
| Gasoline | 2.20 x10-05 | kg/plant |
| Manganese EDTA 13% | 9.62 x10-09 | kg/plant |
| Iron EDTA 13.2% | 3.03 x10-08 | kg/plant |
| Nitric acid, ammonium calcium salt 15.5-0-0 | 4.59 x10-07 | kg/plant |
| Potassium phosphate 0-52-34 | 1.36 x10-05 | kg/plant |
| Magnesium nitrate 11-0-0 Mg 9.5% | 9.62 x10-07 | kg/plant |
| Potassium nitrate 13-0-46 | 6.98 x10-06 | kg/plant |
| Potassium sulfate 50 0-0-52 | 9.35 x10-06 | kg/plant |
| Streptomycin | 1.01 x10-08 | kg/plant |
| Chlorothaonil | 4.36 x10-08 | kg/plant |
| Boscalid | 1.62 x10-07 | kg/plant |
| Copper hydroxide | 9.55 x10-07 | kg/plant |
| Phosphoric acid | 2.10 x10-06 | kg/plant |
| Mancozeb | 1.84 x10-07 | kg/plant |
| Ammonium chloride | 1.58 x10-07 | kg/plant |
| Propamocarb hydrochloride | 3.06 x10-07 | kg/plant |
| Cypronil+Fludioxonil | 1.07 x10-07 | kg/plant |
| Famoxadone+Cymoxanil | 8.14 x10-08 | kg/plant |
| Spinetoram | 2.37 x10-08 | kg/plant |
| Material Transport | 4.58 x10-02 | kg km |
| Waste (to landfill) | 3.79 x10-04 | kg/plant |
| Waste (to recycling) | 1.49 x10-03 | kg/plant |

Life cycle inventory data of the greenhouse phase related to the number of processing tomato transplants produced per year.

**Supplementary material S2**: Specific inventory data collected from the cultivation phase

|  | **2005 Values** | | | | **2015 Values** | | | |
| --- | --- | --- | --- | --- | --- | --- | --- | --- |
| LCI data | Value | Unit | Value | Unit | Value | Unit | Value | Unit |
| Total U.S. tons/ha (produced in field) | 101.31 | US tons/ha | 9.19x10+04 | kg/ha | 135.91 | US tons/ha | 1.23x10+05 | kg/ha |
| Diesel | 11.99 | gal/ac | 1.04x10-03 | kg/kg | 12.44 | gal/Ac | 8.04x10-04 | kg/kg |
| Water for irrigation (electricity) | 841.15 | kWh/ac | 2.26x10-02 | kWh/kg | 624.86 | kWh/ac | 1.25x10-02 | kWh/kg |
| Water for irrigation (diesel) | 31.03 | gal diesel/ac | 2.69x10-03 | kg/kg | 23.05 | gal diesel/ac | 1.49x10-03 | kg/kg |
| Water withdrawal | 977,553 | gal water/ac | 9.96x10+01 | kg/kg | 716,872 | gal water/ac | 5.45x10+01 | kg/kg |
| Zinc | 4.40 | lbs/ac | 5.37x10-05 | kg/kg | 4.40 | lbs/ac | 4.00x10-05 | kg/kg |
| Gypsum | 2,000 | lbs/ac | 2.44x10-02 | kg/kg | 2000 | lbs/ac | 1.82x10-02 | kg/kg |
| UN-32 | 105.72 | lbs/ac | 1.29x10-03 | kg/kg | 166.42 | lbs/ac | 1.51x10-03 | kg/kg |
| CAN17 | 41.63 | lbs/ac | 5.08x10-04 | kg/kg | 61.52 | lbs/ac | 5.59x10-04 | kg/kg |
| 8-24-6 (@N) | 3.92 | lbs/ac | 4.78x10-05 | kg/kg | 5.32 | lbs/ac | 4.84x10-05 | kg/kg |
| 8-24-6 (@P) | 11.76 | lbs/ac | 1.43x10-04 | kg/kg | 15.96 | lbs/ac | 1.45x10-04 | kg/kg |
| 8-24-6 (@K) | 2.94 | lbs/ac | 3.59x10-05 | kg/kg | 1.79 | lbs/ac | 1.63x10-05 | kg/kg |
| 4-10-10 (@N) | 6.83 | lbs/ac | 8.33x10-05 | kg/kg | 6.83 | lbs/ac | 6.21x10-05 | kg/kg |
| 4-10-10 (@P) | 17.17 | lbs/ac | 2.09x10-04 | kg/kg | 17.17 | lbs/ac | 1.56x10-04 | kg/kg |
| 4-10-10 (@K) | 17.17 | lbs/ac | 2.09x10-04 | kg/kg | 17.17 | lbs/ac | 1.56x10-04 | kg/kg |
| 10-34-0 (@N) | 1.45 | lbs/ac | 1.77x10-05 | kg/kg | 1.93 | lbs/ac | 1.75x10-05 | kg/kg |
| 10-34-0 (@P) | 2.15 | lbs/ac | 2.62x10-05 | kg/kg | 2.87 | lbs/ac | 2.61x10-05 | kg/kg |
| Aq ammonia | 43.62 | lbs/ac | 5.32x10-04 | kg/kg | 0.00 | lbs/ac | 0.00 | kg/kg |
| N2O at field (direct + indirect) | 2.79 | lbs/ac | 3.40x10-05 | kg/kg | 3.32 | lbs/ac | 3.02x10-05 | kg/kg |
| NH3 at field | 0.45 | lbs/ac | 5.45x10-06 | kg/kg | 0.68 | lbs/ac | 6.16x10-06 | kg/kg |
| NO at field | 0.06 | lbs/ac | 7.78x10-07 | kg/kg | 0.10 | lbs/ac | 8.80x10-07 | kg/kg |
| N2 at field | 0.10 | lbs/ac | 1.17x10-06 | kg/kg | 0.14 | lbs/ac | 1.32x10-06 | kg/kg |
| Nitrate | 4.04 | kg/ac | 1.09x10-04 | kg/kg | 4.04 | kg/ac | 8.10x10-05 | kg/kg |
| Sulfur | 13.63 | lbs/ac | 1.66x10-04 | kg/kg | 18.86 | lbs/ac | 1.71x10-04 | kg/kg |
| Trifluralin | 0.44 | lbs/ac | 5.37x10-06 | kg/kg | 0.43 | lbs/ac | 3.91x10-06 | kg/kg |
| Lambda cynalothirin | 0.31 | lbs/ac | 3.78x10-06 | kg/kg | 0.15 | lbs/ac | 1.36x10-06 | kg/kg |
| Glyphosate | 2.12 | lbs/ac | 2.59x10-05 | kg/kg | 3.38 | lbs/ac | 3.07x10-05 | kg/kg |
| Chlorothalonil | 0.69 | lbs/ac | 8.42x10-06 | kg/kg | 0.38 | lbs/ac | 3.46x10-06 | kg/kg |
| Rimsulfuron | 0.04 | lbs/ac | 4.88x10-07 | kg/kg | 0.02 | lbs/ac | 1.65x10-07 | kg/kg |
| Oxyfluorfen | 0.05 | lbs/ac | 6.10x10-07 | kg/kg | 0.07 | lbs/ac | 6.36x10-07 | kg/kg |
| Metolachlor | 0.45 | lbs/ac | 5.49x10-06 | kg/kg | 0.86 | lbs/ac | 7.82x10-06 | kg/kg |
| Copper Hydroxide | 0.41 | lbs/ac | 5.00x10-06 | kg/kg | 0.08 | lbs/ac | 7.27x10-07 | kg/kg |
| Adjuvant | 0.06 | lbs/ac | 7.32x10-07 | kg/kg | 0.06 | lbs/ac | 5.46x10-07 | kg/kg |
| Transport for material inputs |  |  | 1.60x10-02 | kg km |  |  | 1.37x10-02 | kg km |

1 Estimated electricity use for groundwater (209.17 kWh/ ac-in water) and for surface water (31.16 kWh/ ac-in water), and 2calculated diesel use for groundwater (5.14-gal diesel/ac-in water) and for surface water (0.77-gal diesel/ac-in water) are used with the assumption that 50% of the processing tomato growers use surface water and 50% use groundwater, and approximately 60% use diesel pumps and 40% use electric pumps.

**Supplementary material S3**: Results of variance and uncertainty analyses for 2005 & 2015 fertilizer data

**
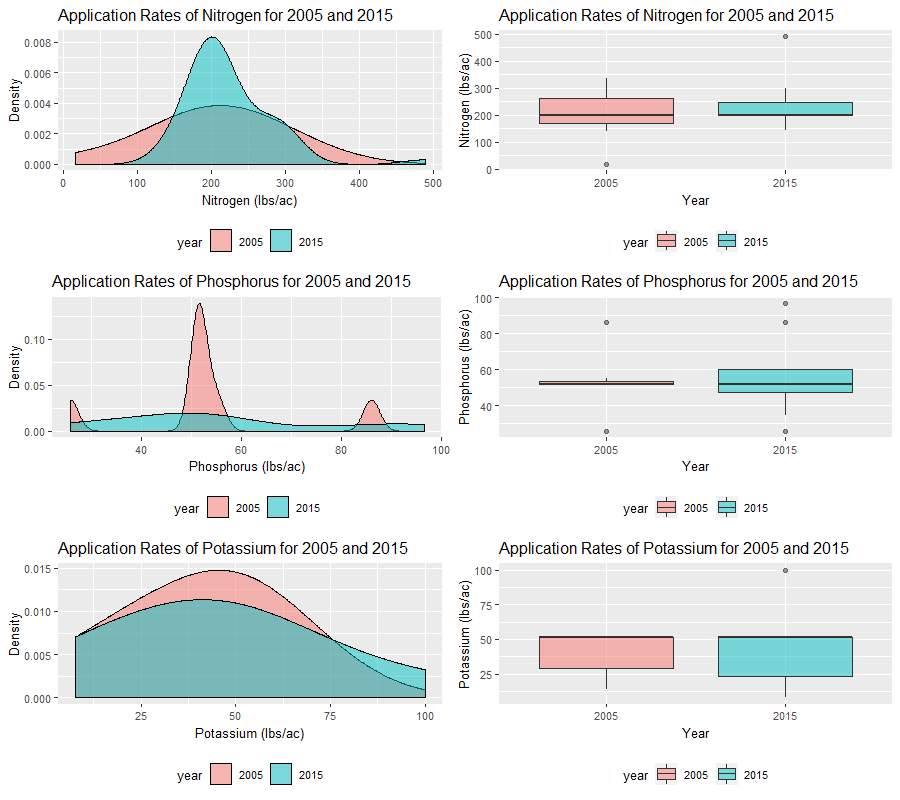
**

Figure of plots of variance for nitrogen, phosphorus (P2O5), and potassium (K2O) without zero values.

Table of application rate estimates using the Bootstrap method with 95% CI

| Year | Nitrogen (lbs/ac) | Phosphorus (lbs/ac) | Potassium (lbs/ac) |
| --- | --- | --- | --- |
| 2005 | 115–217 | 8.83–36.73 | 3.60–25.22 |
| 2015 | 186–232 | 2.52–15.78 | 1.40–13.00 |

n=13 for 2005; n=46 for 2015.

The uncertainty of these variables was analyzed using the Central Limit Theorem (CLT) and the Bootstrap Method. The idea behind the Bootstrap Method is to generate a confidence interval (in this case, a 95% CI) for some data without having to assume anything about the nature of the distribution in the population, given the data do not follow a normal distribution. The results indicate the Bootstrap Method provides slightly narrower intervals compared to the CLT approach. For example, the CLT approach shows 111-219 lbs N/ac for 2005, while the Bootstrap Method results in 115-217 lbs N/ac for 2005. Compared to the averaged values and standard deviation, the averaged values are within the range, and the Bootstrap Method provides less uncertainty in the estimated range of values, i.e. within the 95% CI. In general, this analysis shows the phosphorus and potassium application rates are more uncertain than the nitrogen application rates assessed in this study.

**Supplementary material S4**: Specific inventory data collected for processing facilities

Life cycle inventory data of the facility processing phase related to 1 kg of diced tomato product.

| **LCI data** | **2005 Values** | **2015 Values** | **Unit** |
| --- | --- | --- | --- |
| Averaged total tomato product per year | 18,654,723 | 19,997,990 | kg |
| Grid electricity | 0.017 | 0.012 | kWh/kg |
| Natural gas consumption | 0.04 | 0.032 | kg |
| Water use | 1.59 | 1.24 | kg |
| Diesel | 3.66 x 10-05 | 2.87 x 10-05 | kg |
| Propane | 3.44 x 10-05 | 2.70 x 10-05 | kg |
| 50% Sodium Hydroxide | 1.58 x 10-04 | 1.22 x 10-04 | kg |
| 37% Calcium Chloride | 4.89 x 10-04 | 3.32 x 10-04 | kg |
| 50% Citric Acid | 2.86 x 10-07 | 1.25 x 10-07 | kg |
| Transport for material inputs | 2.46 x 10-03 | 1.73 x 10-03 | kg km |

Life cycle inventory data of the facility processing phase related to 1 kg of paste tomato product.

| **LCI data** | **2005 Values** | **2015 Values** | **Unit** |
| --- | --- | --- | --- |
| Total tomato product per year | 128,263,405 | 209,757,809 | kg |
| Grid electricity | 0.07 | 0.07 | kWh/kg |
| Natural gas consumption | 0.19 | 0.18 | kg |
| Water use | 5.72 | 5.42 | kg |
| Diesel | 1.35 x 10-04 | 1.34 x 10-04 | kg |
| Propane | 1.27 x 10-04 | 1.26 x 10-04 | kg |
| 50% Sodium Hydroxide | 5.18 x 10-04 | 5.09 x 10-04 | kg |
| 37% Calcium Chloride | 2.17 x 10-03 | 2.03 x 10-03 | kg |
| 50% Citric Acid | 1.22 x 10-06 | 9.69 x 10-07 | kg |
| Transport for material inputs | 1.03 x 10-02 | 9.72 x 10-03 | kg km |

**Supplementary material S5**: Transportation distances

**Transport distances for materials used in each phase of tomato processing**

| **Greenhouse1** | | | **Cultivation** | | | **Facility** | |
| --- | --- | --- | --- | --- | --- | --- | --- |
| **Material** | **Use** | **Distance (miles)** | **Material** | **Use** | **Distance (miles)** | **Material** | **Distance (miles)** |
| Vermiculite | growing medium | 1,867 | Potash Corp2 (e.g., UN-32, zinc, kocide) | fertilizer, pesticides | 2,599 | 60% Sodium Hydroxide | 1,124 |
| Peat moss | growing medium | 8,687 | [Thiolux] Sulfur | pesticide | 1,182 | 40% Potassium hydroxide | 2,325 |
| Peat moss | growing medium | 5,496 | [Goal 2XL] Oxyfluorfen | pesticide | 2,214 | 35% HCl | 2,148 |
| Various (Potassium nitrate, Streptomycin, etc.) | fertilizer, pesticides | 1,661 | [Var brands] Dimethoate | pesticide | 2,044 | 37% Calcium chloride | 2,419 |
| Iron EDTA | fertilizer | 2,024 | Bravo weather stick | pesticide | 1,661 | 50% Citric acid | 2,478 |
| Nitric acid, ammonium calcium salt | fertilizer | 2,618 | [Matrix] Rimsulfuron | pesticide | 2,813 | 50% Sodium hydrochloride | 2,197 |
| Potassium phosphate | fertilizer | 1,202 | Diazinon | pesticide | 2,794 |  |  |
| Magnesium nitrate | fertilizer | 7,515 | [Trifluralin 4 E.C.] Trifluralin | pesticide | 1,998 |  |  |
| Potassium nitrate | fertilizer | 7,515 | [Warrior] Lambda cynalothirin | pesticide | 2,709 |  |  |
|  |  |  | Gypsum | soil amendment | 2,091 |  |  |
|  |  |  | Glyphosate | herbicide | 2,015 |  |  |
| TOTAL |  | 38,585 |  |  | 20,014 |  | 12,691 |

**1**Method of transport distance estimation: ArcGIS and Google were used to estimate the total road miles between the material manufacturer and its respective use phase. 2The distance between Potash Corp. and each phase varies, as the location of each phase (greenhouse, cultivation, and facility) differs depending on the use phase or site (e.g., facility or field) location. **1**Greenhouse results are based on 2015 data only.

**Supplementary material S6**: Life Cycle Inventory Metadata

**Greenhouse-LCI Documentation**

| **Source** | **Region** | **Years Valid** | **LCI Name** | **Input** |
| --- | --- | --- | --- | --- |
| - | - | - | - | Water withdrawal |
| G | US | 2013-2019 | natural gas production + combustion | Natural gas |
| G | US-CA | 2015-2018 | Electricity grid mix - CAMX | Electricity |
| G | US | 2009-2016 | 1 kg Diesel [Refinery products] | Diesel |
| G | US | 2009-2016 | 1 m3 US: Diesel, combusted in industrial equipment [Products and Intermediates] | Diesel |
| G | US | 2012 - 2018 | Propane at refinery | Propane |
| E | CH | 2015-0 | Vermiculite Expanded | Vermiculite |
| E | NORDEL | 2015-0 | peat production | Peat moss |
| E | CA-QC | 2015-0 | peat moss production, horticulture use | Peat moss |
| G | US | 2012 - 2018 | Gasoline mix (regular) at filling station | Gasoline |
| E | GLO | 2015-0 | market for EDTA, ethylenediaminetetraacetic acid | Manganese EDTA 13% Mn |
| E | GLO | 2015-0 | market for DTPA, diethylenetriaminepentaacetic acid | Iron EDTA 13.2% Fe |
| G | US | 2015-2018 | Calcium ammonium nitrate (CAN, solid) | Nitric acid, ammonium calcium salt 15.5-0-0 |
| G | US | 2015-2018 | Phosphoric acid (54% P2O5, agrarian) | Potassium phosphate 0-52-34 |
| E | GLO | 2015-0 | market for magnesium | Magnesium nitrate 11-0- Mg 9.4791% |
| G | US | 2015-2018 | Nitric acid (60%) | Magnesium nitrate 11-0- Mg 9.4791% |
| G | US | 2012-2018 | Hydrogen at refinery | Magnesium nitrate 11-0- Mg 9.4791% |
| E | GLO | 2015-0 | Field application of potassium nitrate | Potassium nitrate 13-0-46 |
| E | GLO | 2015-0 | Field application of potassium nitrate | Potassium nitrate 13-0-46 |

**Supplementary material S6**: Life Cycle Inventory Metadata CONT.

**Greenhouse-LCI Documentation cont.**

| **Source** | **Region** | **Years Valid** | | **LCI Name** | | **Input** |
| --- | --- | --- | --- | --- | --- | --- |
| E | GLO | 2015-0 | | market for potassium sulfate, as K2O | | Potassium sulfate 50 0-0-52 |
| G | US | 2015-2018 | | Lactic acid (fermentative) | | Streptomycin |
| E | GLO | 2015-0 | | market for chlorothalonil | | Chlorothalonil |
| G | US | 2015-2018 | | Chlorobenzene (by product chlorobenzene, hydrochloric acid) | | Boscalid |
| G | US | 2015-2018 | | Nitric acid (60%) | | Boscalid |
| G | US | 2015-2018 | | Oxygen (liquid) | | Bosalid |
| G | US | 2012-2018 | | Hydrogen at refinery | | Boscalid |
| E | RNA | 2015-2018 | | copper production, primary | | Copper hydroxide |
| G | US | 2015-2018 | | Oxygen (liquid) | | Copper hydroxide |
| G | US | 2012-2018 | | Hydrogen at refinery | | Copper hydroxide |
| G | US | 2015-2018 | | Phosphoric acid (75%) | | Phosphoric acid |
| E | GLO | 2015-0 | | market for mancozeb | | Mancozeb |
|  |  |  | |  | |  |
| E | GLO | 2015-0 | | market for esterquat | | Ammonium chloride |
| E | GLO | 2015-0 | | market for trimethylamine | | Propamocarb hydrochloride |
| G | US | 2015-2018 | | Oxygen (liquid) | | Propamocarb hydrochloride |
| G | US | 2015-2018 | | Chlorine mix | | Propamocarb hydrochloride |
| E | GLO | 2015-0 | market for esterquat | |
| E | GLO | 2015-0 | | market for trimethylamine | | Propamocarb hydrochloride |

**Supplementary material S6**: Life Cycle Inventory Metadata CONT.

**Greenhouse-LCI Documentation cont.**

| **Source** | **Region** | **Years Valid** | **LCI Name** | **Inputs** |
| --- | --- | --- | --- | --- |
| G | US | 2015-2018 | Oxygen (liquid) | Propamocarb hydrochloride |
| G | US | 2015-2018 | Chlorine mix | Propamocarb hydrochloride |
| G | US | 2015-2018 | Aniline (Phenyl amine, Amino benzene) | Cypronil + Fludioxonil |
| E | RoW | 2015-0 | fluorine production, liquid | Cypronil + Fludioxonil |
| G | US | 2015-2018 | Oxygen (liquid) | Cypronil + Fludioxonil |
| E | GLO | 2015-0 | market for N-methyl-2-pyrrolidone | Famoxadone+Cymoxanil |
| G | US | 2015-2018 | Acetone (from cumene) | Famoxadone+Cymoxanil |
| E | GLO | 2015-0 | market for pesticide, unspecified | Spinetoram |
| G | US | 2009-2016 | US: Transport, combination truck, average fuel mix [Products and Intermediates] | Average Material Transport |

**Supplementary material S6**: Life Cycle Inventory Metadata CONT.

**Cultivation-LCI Documentation**

| **Source** | **Region** | **Years Valid** | **LCI Name** | **Inputs** |  |
| --- | --- | --- | --- | --- | --- |
| G | US | 2009-2016 | 1 kg Diesel [Refinery products] | Diesel |  |
| G | US | 2009-2016 | 1 m3 US: Diesel, combusted in industrial equipment [Products and Intermediates] | Diesel |  |
| G | US-CA | 2015-2018 | Electricity grid mix - CAMX | Water for irrigation |  |
| - | - | - | - | Water withdrawal |  |
| E | GLO | 2015-0 | market for zinc | Zinc |  |
| E | GLO | 2015-0 | market for gypsum, mineral | Gypsum |  |
| G | US-CA | 2015-2018 | Urea (agrarian) | UN-32 |  |
| G | US-CA | 2015-2018 | Ammonium nitrate (AN, solution) 52% N | UN-32 |  |
| G | US | 2015-2018 | Calcium ammonium nitrate (CAN, solid) | CAN17 |  |
| - | - | - | - | N2O in field |  |
| G | US | 2015-2018 | Ammonia (liquid, agriculture) | Aq ammonia |  |
| G | US | 2012-2018 | Sulphur (elemental) at refinery | [Thiolux] Sulfur |  |
| E | GLO | 2015-0 | market for dinitroaniline-compound | [Trifluralin 4 E.C.] Trifluralin |  |
| E | GLO | 2015-0 | market for pyrethroid-compound | [Warrior] Lambda cyhalothrin |  |
| E | GLO | 2015-0 | market for benzoic acid | [Intrepid] Methoxyfenozide |  |
| G | US | 2015-2018 | Nitrogen (liquid) | [Intrepid] Methoxyfenozide |  |
| E | GLO | 2015-0 | market for organophosphorous-compound, unspecified | [DiazinonAG500] Diazinon |  |
| E | GLO | 2015-0 | glyphosate production | [Round Up or GLY-4 or Makaze] Glyphosate |  |
| E | GLO | 2015-0 | market for chlorothalonil | [BRAVO] Chlorothalonil |  |
| E | GLO | 2015-0 | market for [sulfonyl]urea-compound | [Matrix] Rimsulfuron |  |
| E | GLO | 2015-0 | Diphenylether (sub. for Oxyflurefen) | Oxyflurefen |  |
| E | GLO | 2015-0 | market for paraffin | Adjuvant |  |
| E | GLO | 2015-0 | market for metolachlor | [Dual Magnum] Metolachlor |  |
| G | US | 2009-2016 | US: Transport, combination truck, average fuel mix [Products and Intermediates] | Average Material Transport |  |

**Supplementary material S6**: Life Cycle Inventory Meta Data CONT.

**Processing Facility-LCI Documentation**

| **Source** | **Region** | **Years Valid** | **LCI Name** | **Inputs** |
| --- | --- | --- | --- | --- |
| G | US-CA | 2015-2018 | Electricity grid mix - CAMX | Electricity |
| G | US | 2010-2018 | Electricity from natural gas (West) | Natural gas |
| G | US | 2009-2016 | 1 kg Diesel [Refinery products] | Diesel |
| G | US | 2009-2016 | 1 m3 US: Diesel, combusted in industrial equipment [Products and Intermediates] | Diesel |
| G | US | 2012-2018 | Propane at refinery | Propane |
| G | US | 2015-2018 | Sodium hydroxide (caustic soda) mix (100%) | Sodium Hydroxide 50% |
| E | GLO | 2015-0 | market for calcium chloride | Calcium Chloride 37% |
| G | US | 2015-2018 | Citric acid (from starch) | Citric Acid 50% |
| G | US | 2009-2016 | US: Transport, combination truck, average fuel mix [Products and Intermediates] | Average Material Transport |

Abbreviations: G refers to the GaBi database and reference LCI source; E refers to the Ecoinvent database and reference LCI source. Region abbreviations: US refers to the United States; GLO = global; RNA = North America; RoW = Rest of World; NORDEL = Nordic Countries Power Association; CA-QC = Canada, Québec; CH = Switzerland; US-CA = United States, California.

**Supplementary material S7**: LCIA results for paste and diced product production in 2005 and 2015

**Paste (per kg) tomato product – 2005 and 2015 LCIA Results**

| **Impact category** | **Year** | **Greenhouse1** | **Cultivation** | **Facility processing** | **Transport** | **Total** |
| --- | --- | --- | --- | --- | --- | --- |
| AP (dag SO2 eq.) | 2005 | 3.85E-03 | 1.23E-01 | 3.48E-02 | 1.74E-02 | 1.79E-01 |
| 2015 | 3.85E-03 | 7.99E-02 | 3.27E-02 | 1.68E-02 | 1.33E-01 |
| POCP (g C2H4 eq.) | 2005 | 6.29E-03 | 1.13E-01 | 8.21E-02 | 2.09E-02 | 2.22E-01 |
| 2015 | 6.29E-03 | 6.97E-02 | 7.71E-02 | 2.01E-02 | 1.73E-01 |
| ODP (µg CFC-11 eq.) | 2005 | 7.10E-02 | 5.94E-01 | 1.28E-01 | 1.25E-03 | 7.94E-01 |
| 2015 | 7.10E-02 | 4.86E-01 | 1.20E-01 | 1.20E-03 | 6.78E-01 |
| EP (g PO4 eq.) | 2005 | 7.00E-03 | 3.83E-01 | 6.67E-02 | 3.11E-02 | 4.87E-01 |
| 2015 | 7.00E-03 | 2.70E-01 | 6.27E-02 | 2.99E-02 | 3.70E-01 |
| FAETP (Hg DCB eq.) | 2005 | 1.71E-03 | 2.65E-01 | 1.71E-02 | 9.95E-02 | 3.84E-01 |
| 2015 | 1.71E-03 | 1.64E-01 | 1.61E-02 | 9.57E-02 | 2.77E-01 |
| TETP  (Hg DCB eq.) | 2005 | 7.78E-03 | 1.01E-01 | 4.22E-02 | 1.76E-05 | 1.51E-01 |
| 2015 | 7.78E-03 | 5.74E-02 | 4.00E-02 | 1.69E-05 | 1.05E-01 |
| MAETP (Mg DCB eq.) | 2005 | 9.11E-04 | 1.06E-01 | 5.33E-03 | 3.77E-02 | 1.50E-01 |
| 2015 | 9.11E-04 | 6.61E-02 | 5.05E-03 | 3.63E-02 | 1.08E-01 |
| HTP  (kg DCB eq.) | 2005 | 3.07E-03 | 1.59E-01 | 1.66E-02 | 2.83E-02 | 2.07E-01 |
| 2015 | 3.07E-03 | 1.01E-01 | 1.57E-02 | 2.73E-02 | 1.47E-01 |
| GWP100 (kg CO2-eq) | 2005 | 4.31E-02 | 2.45E-01 | 6.21E-01 | 3.55E-02 | 9.45E-01 |
| 2015 | 4.31E-02 | 1.67E-01 | 5.83E-01 | 3.41E-02 | 8.27E-01 |
| Total Primary Energy (MJ/100) | 2005 | 1.14E-02 | 3.99E-02 | 1.02E-01 | 4.74E-03 | 1.58E-01 |
| 2015 | 1.14E-02 | 2.41E-02 | 9.55E-02 | 4.56E-03 | 1.36E-01 |
| Total Freshwater Consumption (Mg) | 2005 | 1.73E-04 | 5.99E-01 | 6.12E-03 | 0.00E+00 | 6.05E-01 |
| 2015 | 1.73E-04 | 3.23E-01 | 5.80E-03 | 0.00E+00 | 3.28E-01 |

**1**Greenhouse results are based on 2015 data only.

**Supplementary material S7:** LCIA results for paste and diced product production in 2005 and 2015 CONT.

**Diced (per kg) tomato product – 2005 and 2015 LCIA Results**

| **Impact category** | **Year** | **Greenhouse1** | **Cultivation** | **Facility processing** | **Transport** | **Total** |
| --- | --- | --- | --- | --- | --- | --- |
| AP (dag SO2 eq.) | 2005 | 8.34E-04 | 2.66E-02 | 8.09E-03 | 3.79E-03 | 3.93E-02 |
| 2015 | 8.34E-04 | 1.73E-02 | 5.87E-03 | 3.62E-03 | 2.76E-02 |
| POCP (g C2H4 eq.) | 2005 | 1.36E-03 | 2.45E-02 | 1.89E-02 | 4.54E-03 | 4.93E-02 |
| 2015 | 1.36E-03 | 1.51E-02 | 1.37E-02 | 4.33E-03 | 3.45E-02 |
| ODP (µg CFC-11 eq.) | 2005 | 1.54E-02 | 1.29E-01 | 2.91E-02 | 2.72E-04 | 1.73E-01 |
| 2015 | 1.54E-02 | 1.05E-01 | 1.99E-02 | 2.60E-04 | 1.41E-01 |
| EP (g PO4 eq.) | 2005 | 1.52E-03 | 8.29E-02 | 1.54E-02 | 6.75E-03 | 1.07E-01 |
| 2015 | 1.52E-03 | 5.85E-02 | 1.12E-02 | 6.44E-03 | 7.77E-02 |
| FAETP (Hg DCB eq.) | 2005 | 3.71E-04 | 5.75E-02 | 3.99E-03 | 2.16E-02 | 8.35E-02 |
| 2015 | 3.71E-04 | 3.55E-02 | 2.92E-03 | 2.06E-02 | 5.94E-02 |
| TETP  (Hg DCB eq.) | 2005 | 1.69E-03 | 2.18E-02 | 1.03E-02 | 3.82E-06 | 3.38E-02 |
| 2015 | 1.69E-03 | 1.24E-02 | 7.49E-03 | 3.65E-06 | 2.16E-02 |
| MAETP (Mg DCB eq.) | 2005 | 1.97E-04 | 2.29E-02 | 1.27E-03 | 8.20E-03 | 3.26E-02 |
| 2015 | 1.97E-04 | 1.43E-02 | 9.19E-04 | 7.82E-03 | 2.33E-02 |
| HTP  (kg DCB eq.) | 2005 | 6.66E-04 | 3.44E-02 | 3.90E-03 | 6.16E-03 | 4.51E-02 |
| 2015 | 6.66E-04 | 2.19E-02 | 2.80E-03 | 5.88E-03 | 3.13E-02 |
| GWP100 (kg CO2-eq) | 2005 | 9.34E-03 | 5.31E-02 | 1.43E-01 | 7.71E-03 | 2.13E-01 |
| 2015 | 9.34E-03 | 3.61E-02 | 1.04E-01 | 7.36E-03 | 1.57E-01 |
| Total Primary Energy (MJ/100) | 2005 | 2.48E-03 | 8.64E-03 | 2.34E-02 | 1.03E-03 | 3.56E-02 |
| 2015 | 2.48E-03 | 5.22E-03 | 1.70E-02 | 9.83E-04 | 2.57E-02 |
| Total Freshwater Consumption (Mg) | 2005 | 3.74E-05 | 1.30E-01 | 1.69E-03 | 0.00E+00 | 1.31E-01 |
| 2015 | 3.74E-05 | 6.99E-02 | 1.32E-03 | 0.00E+00 | 7.12E-02 |

1 Greenhouse results are based on 2015 data only.

**Supplementary information S8**

USES-LCA results for direct emissions from pesticides

| Substance | CAS No. | Type | Initial emission compartment | | | | |
| --- | --- | --- | --- | --- | --- | --- | --- |
| Name |  |  | Air | Fresh water | Sea water | Agricul. soil | Indust. soil |
| Diazinon | 333-41-5 | FAETP | 3.24 | 4.35×102 | 2.07×10-3 | 1.63×10 | 1.02×102 |
|  |  | MAETP | 3.01 | 2.41×10 | 6.07×10 | 9.57×10-1 | 5.69 |
|  |  | TETP | 1.44×103 | 3.18×10 | 2.13 | 2.73×10 | 2.07×10 |
|  |  | HTP | 1.52×102 | 5.99×102 | 2.16 | 3.80×10 | 1.42×102 |
|  |  | Carc. | 0.00 | 0.00 | 0.00 | 0.00 | 0.00 |
|  |  | Non-Carc. | 1.52×102 | 5.99×102 | 2.16 | 3.80×10 | 1.42×102 |
| Chlorothalonil | 1897-45-6 | FAETP | 1.87×10 | 6.73×102 | 1.02 | 2.65×10 | 1.58×102 |
|  |  | MAETP | 1.85×102 | 1.93×102 | 2.66×102 | 8.08×10 | 1.08×102 |
|  |  | TETP | 2.23×104 | 8.82×103 | 1.36×103 | 9.33×103 | 9.77×103 |
|  |  | HTP | 5.31 | 1.01×10 | 3.46×10-1 | 2.20 | 3.75 |
|  |  | Carc. | 5.13×10-2 | 9.70×10-2 | 3.32×10-3 | 2.12×10-2 | 3.61×10-2 |
|  |  | Non-Carc. | 5.26 | 1.00×10 | 3.42×10-1 | 2.18 | 3.72 |
| Mancozeb | 8018-01-7 | FAETP | 7.92 | 7.80×10 | 7.70×10-12 | 1.07×10 | 5.67×10 |
|  |  | MAETP | 3.85 | 4.31 | 1.04×10 | 5.89×10-1 | 3.13 |
|  |  | TETP | 4.23×104 | 9.45×10-6 | 6.22×10-8 | 8.45×10-4 | 3.59×10-5 |
|  |  | HTP | 4.95×10 | 2.43 | 6.02×10-4 | 2.75 | 1.77 |
|  |  | Carc. | 0.00 | 0.00 | 0.00 | 0.00 | 0.00 |
|  |  | Non-Carc. | 4.95×10 | 2.43 | 6.02×10-4 | 2.75 | 1.77 |
| Propamocarb HCL | 25606-41-1 | FAETP | 1.63×10-2 | 3.44×10-1 | 8.49×10-12 | 3.02×10-2 | 1.82×10-1 |
|  |  | MAETP | 8.39×10-3 | 1.90×10-2 | 4.60×10-2 | 1.67×10-3 | 1.01×10-2 |
|  |  | TETP | 2.39×10 | 4.28×10-7 | 2.75×10-8 | 4.05×10-6 | 2.92×10-6 |
|  |  | HTP1 | 0.00 | 0.00 | 0.00 | 0.00 | 0.00 |
| Fludioxonil | 131341-86-1 | FAETP | 1.22×10 | 2.75×102 | 6.95E-05 | 9.31 | 6.98×10 |
|  |  | MAETP | 1.53×10 | 2.28×10 | 4.46×10 | 7.74×10-1 | 5.80 |
|  |  | TETP | 1.16×104 | 1.45 | 1.10×10-1 | 1.06 | 1.15 |
|  |  | HTP | 0.00 | 0.00 | 0.00 | 0.00 | 0.00 |
| Cymoxanil | 57966-95-7 | FAETP | 2.24×10-2 | 1.90 | 1.63×10-9 | 4.89×10-3 | 4.14×10-2 |
|  |  | MAETP | 1.39×10-1 | 1.06×10-1 | 4.26×10-1 | 2.73×10-4 | 2.31×10-3 |
|  |  | TETP | 8.04 | 7.50×10-7 | 6.42×10-7 | 4.12×10-8 | 5.49×10-8 |
|  |  | HTP | 0.00 | 0.00 | 0.00 | 0.00 | 0.00 |
| Trifluralin | 1582-09-8 | FAETP | 3.54×10-2 | 3.54×10 | 2.11×10-2 | 4.38×10-1 | 3.61 |
|  |  | MAETP | 1.52 | 4.61 | 4.72×10 | 6.14×10-1 | 9.79×10-1 |
|  |  | TETP | 2.95×10 | 3.18×10 | 1.82×10 | 1.13×10 | 1.32×10 |
|  |  | HTP | 4.58 | 1.32×102 | 6.44 | 5.31 | 1.41×10 |
|  |  | Carc. | 1.34×10-1 | 3.80 | 1.86×10-1 | 1.53×10-1 | 4.07×10-1 |
|  |  | Non-Carc. | 4.44 | 1.28×102 | 6.25 | 5.16 | 1.37×10 |
| Glyphosate | 38641-94-0 | FAETP | 2.43×10-1 | 2.45 | 1.15×10-16 | 3.65×10-1 | 1.67 |
|  |  | MAETP | 9.19×10-2 | 5.83×10-2 | 2.62×10-1 | 8.68×10-3 | 3.97×10-2 |
|  |  | TETP | 1.26×103 | 1.64×10-10 | 8.87×10-13 | 1.57×10-5 | 6.26×10-10 |
|  |  | HTP | 0.00 | 0.00 | 0.00 | 0.00 | 0.00 |
| Rimsulfuron | 122931-48-0 | FAETP | 2.29 | 2.72×10 | 1.15×10-5 | 3.87 | 2.05×10 |
|  |  | MAETP | 1.05 | 2.26 | 4.23 | 3.22×10-1 | 1.70 |
|  |  | TETP | 8.30×103 | 1.12 | 8.10×10-2 | 1.43×10 | 4.47 |
|  |  | HTP | 0.00 | 0.00 | 0.00 | 0.00 | 0.00 |
| Oxyfluorfen | 42874-03-3 | FAETP | 1.30 | 1.77×102 | 2.81×10-2 | 3.29×10-1 | 2.36 |
|  |  | MAETP | 3.59×10 | 3.61×10 | 1.60×102 | 7.52×10-1 | 1.16 |
|  |  | TETP | 5.01×102 | 3.18×10 | 1.15×10 | 9.68 | 1.00×10 |
|  |  | HTP | 5.97×102 | 4.17×103 | 1.25×102 | 2.24×10 | 6.56×10 |
|  |  | Carc. | 0.00 | 0.00 | 0.00 | 0.00 | 0.00 |
|  |  | Non-Carc. | 5.97×102 | 4.17×103 | 1.25×102 | 2.24×10 | 6.56×10 |
| Metolachlor | 87392-12-9 | FAETP | 4.87 | 1.47×102 | 3.69×10-4 | 9.37 | 6.18×10 |
|  |  | MAETP | 3.56 | 1.22×10 | 2.33×10 | 7.89×10-1 | 5.14 |
|  |  | TETP | 5.07×103 | 1.13×10 | 8.30×10-1 | 1.84×10 | 1.57×10 |
|  |  | HTP | 5.61 | 3.37 | 1.21×10-2 | 3.42×10-1 | 1.43 |
|  |  | Carc. | 0.00 | 0.00 | 0.00 | 0.00 | 0.00 |
|  |  | Non-Carc. | 5.61 | 3.37 | 1.21×10-2 | 3.42×10-1 | 1.43 |

Freshwater aquatic ecotoxicity potential (FAETP), marine aquatic ecotoxicity potential (MAETP), terrestrial ecotoxicity potential (TETP), and human toxicity potential (HTP) are estimated in 1.4-DCB equivalents. HTP is the sum of the carcinogenic (carc.) and the noncarcinogenic (non-carc.) human toxicity potentials. 1In cases where HTP summed to zero the carc. and non-carc. results are not presented.
